# Supplementary material for: Active Learning Methods in Anatomy Teaching for Operating Room Nursing
Source: Preprints.org preprint supplement (doi:10.20944/preprints202405.0363.v1), 2024-05-07
Supplement: Supplementary file 1 [file supplementary]

## Sheet: Anatomi operasjonssykepleie fle
Nummer	Fysisk_samling	Etterfølgende_undervisning	Tegneblokker_aktiv	Tegneblokker_lettere_forstå	Tegneblokker_læringsutbytte	Tegneblokker_PowerPoint	Tegneblokker_arbeid_utenom	Tegneblokker_brukt_tegning_selv	VRbriller_erfaring	Anatomiprogrammet_lett_å_bruke	Anatomiske_strukturer_lette_å_finne	VRbriller_lettere_forstå	VRbriller_større_forståelse	VRbriller_læringsutbytte	Fordeling_VRbriller_tegning	Demonstrasjon_operasjonsbord_nyttig	Undervisng_sammenheng
1	1	3	1	1	1	5	1	4	1	3	2	2	1	2	1	2	2
2	1	3	1	1	1	5	1	2	1	1	2	3	2	2	1	2	2
3	1	3	1	1	1	5	1	2	3	2	3	2	2	3	1	2	1
4	1	3	1	1	1	5	1	1	1	1	1	1	1	1	1	1	1
5	1	3	1	1	1	5	1	5	1	2	2	2	1	2	#NULL!	3	2
6	1	3	1	1	1	5	1	1	1	2	1	1	1	1	1	2	1
7	1	3	1	1	1	4	1	2	1	2	2	1	1	1	1	1	1
8	1	3	1	1	1	3	1	1	1	2	3	1	1	2	3	1	2
9	1	3	1	1	1	5	2	1	1	3	2	1	1	2	1	3	3
10	1	3	1	1	1	4	1	1	1	4	3	3	3	3	3	1	2
11	1	3	1	1	1	5	1	2	1	2	2	1	1	1	1	1	2
12	1	3	1	2	1	5	1	2	1	2	3	3	2	3	3	5	5
13	1	3	1	1	1	5	3	4	2	2	2	2	2	2	2	3	1
14	1	3	1	1	1	5	1	1	1	2	3	2	1	2	1	1	1
15	1	3	1	1	1	5	1	1	1	1	2	1	1	1	2	1	1
16	1	3	1	2	1	2	1	1	2	1	1	1	1	1	2	1	1
17	1	3	1	1	1	1	1	1	1	1	1	1	1	1	1	1	1
18	1	3	2	1	1	5	3	4	1	1	2	1	1	1	2	1	1
19	1	3	1	1	1	5	1	2	2	3	4	3	2	3	3	1	2
20	1	3	1	1	1	5	1	1	1	1	1	1	1	2	3	1	1
21	1	3	1	1	1	5	1	2	1	2	2	2	2	2	1	2	2
22	1	3	1	1	1	5	1	1	1	1	2	2	1	2	1	3	3
23	1	3	1	1	1	5	1	1	1	2	2	1	1	1	1	1	1
24	1	3	1	1	1	5	1	1	1	2	2	2	1	#NULL!	1	1	1
25	1	2	1	1	1	5	1	1	1	2	2	1	1	1	1	1	1
26	1	3	1	2	2	5	4	4	2	4	4	2	1	2	1	1	1
27	1	3	1	1	1	4	1	1	1	1	2	1	1	1	2	2	2
28	1	3	1	1	1	1	4	4	1	2	1	2	2	2	2	2	2
